# Supplementary material for: The differentially DNA-methylated region responsible for expression of runt-related transcription factor 2
Source: PubMed Central journal article supplement — J Vet Med Sci. 2016 Dec 4;79(2):230–7. doi: 10.1292/jvms.16-0321 (PMC5326923; doi:10.1292/jvms.16-0321), 2016-12-04
Supplement: jvms-79-230-s001.pdf [file jvms-79-230-s001.pdf]

## Wakitani\_Supplementary Figure

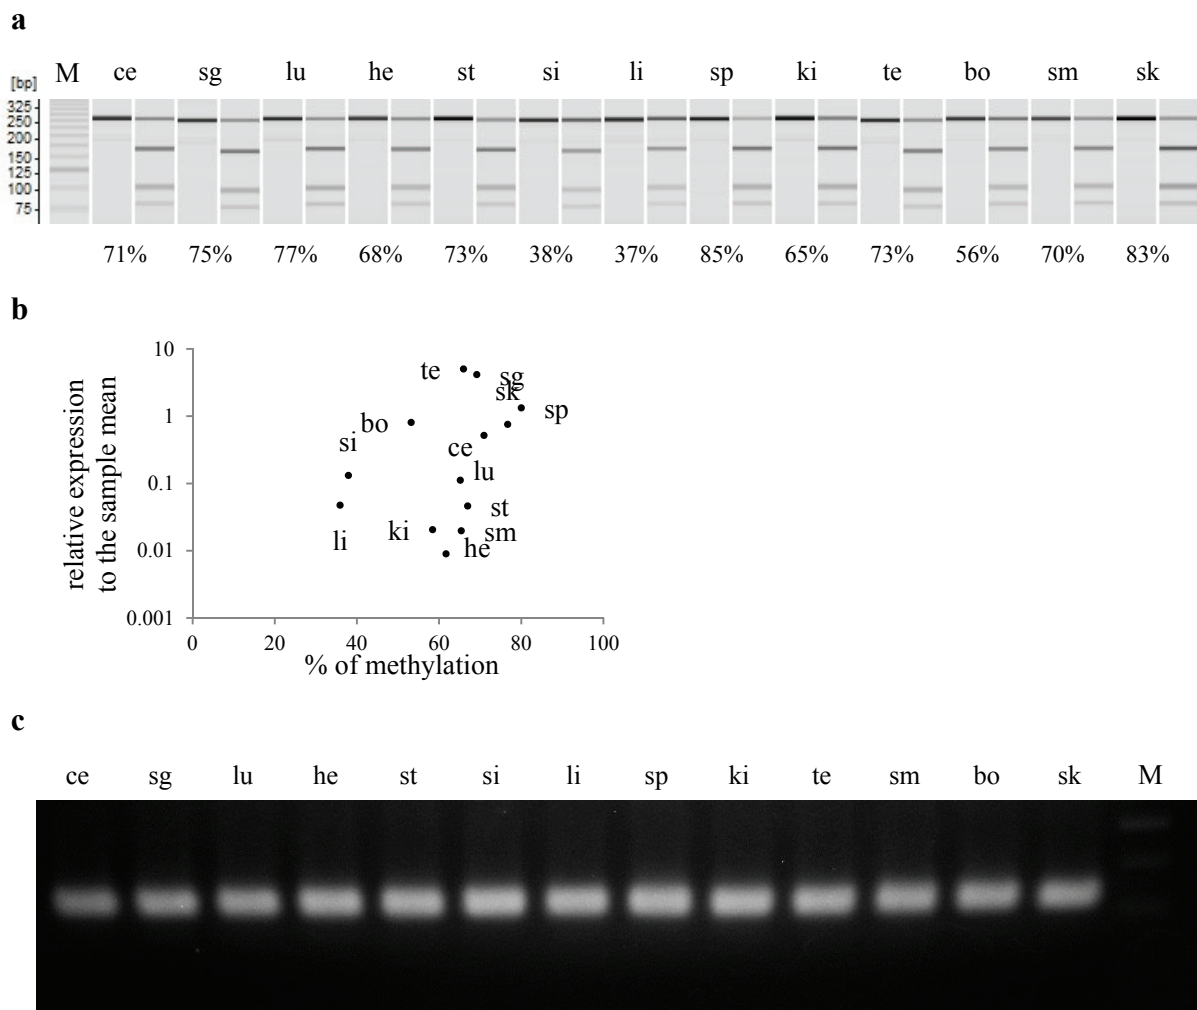

### Supplementary Figure. DNA methylation of the external region of Runx2-DMR.

a) A gel image as output from the results of combined bisulfite restriction analysis (CoBRA) targeting CpG-3,210 in mouse organs. Fragments digested with HpyCH4IV were loaded onto odd lanes except for the leftmost lane (showing a 25-bp DNA ladder; M). In the lanes immediately on the left, the fragment without HpyCH4IV digestion is loaded as an experimental control. b) Each organ is plotted on the scatter diagram. Vertical and horizontal scales indicate expression levels of Runx2 mRNA and the methylation rate of CpG-3,210, respectively. There is no significant correlation among mouse organs. c) Bisulfite PCR fragment digested with HpyCH4IV targeting CpG-1,297 is loaded. Methylation of CpG-1,297 was not detected in each organ. ce: cerebellum, sg: salivary glands, lu: lungs, he: heart, st: stomach, si: small intestine, li: liver, sp: spleen, ki: kidneys, te: testes, bo: bone, sm: skeletal muscle, and sk: skin.

**Supplementary Table S1.** The list of dogs used in this study

|     | Breed                 | Sex    | Age   | Statement                            |
|-----|-----------------------|--------|-------|--------------------------------------|
| #1  | Poodle (Toy)          | male   | 3y    | fracture                             |
| #2  | Maltese               | female | 8y    | disc injury                          |
| #3  | Dachshund (Miniature) | male   | 6y10m | disc hernia                          |
| #4  | Labrador Retriever    | female | 8y5m  | disc hernia                          |
| #5  | Poodle (Toy)          | female | 1y11m | portosystemic shunt<br>patent ductus |
| #6  | Dachshund (Miniature) | male   | 5y    | disc hernia                          |
| #7  | Dachshund (Kaninchen) | male   | 3y8m  | disc hernia                          |
| #8  | Dachshund (Miniature) | male   | 9y7m  | disc hernia                          |
| #9  | Poodle (Toy)          | male   | 4y8m  | disc hernia                          |
| #10 | Dachshund (Miniature) | female | 3y11m | disc hernia                          |
| #11 | Beagle                | female | 3y    | healthy                              |
| #12 | Beagle                | female | 2y8m  | healthy                              |

**Supplementary Table S2. The list of primers used in this study**

| Purpose<br>Target                                     | Primer sequence<br>Forward | Reverse                   |
|-------------------------------------------------------|----------------------------|---------------------------|
| <b>CoBRA (CpG at Runx2 promoter in mouse)</b>         |                            |                           |
| -7,885                                                | AGGGGATAGAGGAATGATTTAATTG  | TCCTCCCCTTTCTCTATACCATTAT |
| -6491, -6456                                          | TGGGATTTGATTTTAGTTAGATAGG  | AATACAAAACCCACCATTTTCAC   |
| -4656, -4646, -4619                                   | TTTAAATTGGTTAGTGGGTTTGAGA  | AAAAATCAATACTATCACCCAACC  |
| -3378, -3326, -3306                                   | TTTATTTTGATATTTGGGTGAGTGG  | CCCTCAAACCTCCCCTAACAATAA  |
| -3210                                                 | TGTTTTTATTGTTAGGGGAAGTTG   | AATTCCCAATCTTAAATCCCTTAAA |
| -2505                                                 | TTTGTGGGTTGTGTTATTAAGAAA   | AAACCAACTTCCTAACCCATCTAA  |
| -2060                                                 | GTGGTTTAGGGAGGTGATTTAAGTT  | AATCACTACTTCTACCTCCCCTTTC |
| -1297                                                 | GATATTGTTTTGTTTGGTTTTTGG   | CAACCTCAAATTCTAAACCTTCAA  |
| -535, -478                                            | TAATTAATGTGGGGTGGGGTTG     | CCCACCTCACCCTCAAAACC      |
| +1200, +1334                                          | GTTGTGAGATTTTGGGTTTTTAG    | ATCCCCAAATTTACTAAACACTCTC |
| +2369, +2557                                          | GGAGAGAGAGGAAAGAAAGAAAGA   | ATCTAACCTTTTCACACCACAAAA  |
| <b>Bisulfite sequencing (Runx2 promoter in mouse)</b> |                            |                           |
| -3371 to -3148                                        | TTTATTTTGATATTTGGGTGAGTGG  | AATTCCCAATCTTAAATCCCTTAAA |
| -2985 to -2649                                        | ATGTTTAATGGAGGGAGGATGTT    | CATACCTACCCCTCCTACCCTTA   |
| -2505 to -2039                                        | TTTGTGGGTTGTGTTATTAAGAAA   | AATCACTACTTCTACCTCCCCTTTC |
| <b>CoBRA (CpG at Runx2 promoter in dog)</b>           |                            |                           |
| -2829                                                 | GTGGATTTTTTGGGAGAAGGATAGT  | CTCCATAACCACATACTAACACTC  |
| <b>Real-time RT-PCR</b>                               |                            |                           |
| mouse Runx2                                           | GACGAGGCAAGAGTTTCACC       | GTCTGTGCCTTCTTGGTTCC      |
| mouse Dlx5                                            | TTATGCCGACTACGGCTACG       | TGGTTTACCATTACCCATCCTC    |
| mouse Gapdh                                           | CCACCCAGAAGACTGTGGAT       | GGATGCAGGGATGATGTTCT      |
| dog Runx2                                             | CCTTCCACTCTCAGTAAGAAGAGC   | ATTCGTGGGTTGGAGAAGC       |
| dog Dlx5                                              | CTTACGCCGACTACAGCTACG      | TGGTTTGCCATTACCCATC       |
| dog Spp1                                              | TGTGGCTTATGGACTGAGGTC      | AGGACGGCATTGAAGTCATC      |
| dog CD29                                              | TGAATGCCAAATGGGACAC        | GCTCATTTTCCCTCATACTTCG    |
| dog CD44                                              | TGCATCGCTGTCAATAGTCG       | TGTTTACCAAGTGCACCATCTC    |
| dog CD90                                              | ACATGTGAACTCCGGCTCTC       | GGCTTATGCCCTCACACTTG      |
| dog CD105                                             | ACTGTGGTGCTCAAGAAAGACC     | TGCCACAGCTGGAGTAAGTG      |
| dog Rpl13a                                            | GAAGGAAAAGGCCAAGATCC       | GAAGGAAAAGGCCAAGATCC      |
